# Supplementary material
Source: publisher figshare collection journal article supplement (https://sage.figshare.com/ndownloader/files/20446935)
Supplement: Supplementary file 1 [file 20446935]

## Appendix I: Variables Used in Model of Study 2 (Internally Displaced Persons and the Cyprus Peace Process Chaltis et. al 2020)

| Variable                                                   | Description                                                                                                                                                                                                                                                                                                                                                                                                                                                                                                                                                                                                                                                                                                                                                                                      |
|------------------------------------------------------------|--------------------------------------------------------------------------------------------------------------------------------------------------------------------------------------------------------------------------------------------------------------------------------------------------------------------------------------------------------------------------------------------------------------------------------------------------------------------------------------------------------------------------------------------------------------------------------------------------------------------------------------------------------------------------------------------------------------------------------------------------------------------------------------------------|
| <b><i>Dependent Variable</i></b>                           |                                                                                                                                                                                                                                                                                                                                                                                                                                                                                                                                                                                                                                                                                                                                                                                                  |
| Rotating presidency for Morphou                            | Whether the respondent was accepting the exchange of rotating presidency with Morphou                                                                                                                                                                                                                                                                                                                                                                                                                                                                                                                                                                                                                                                                                                            |
| <b><i>Structural Factors</i></b>                           |                                                                                                                                                                                                                                                                                                                                                                                                                                                                                                                                                                                                                                                                                                                                                                                                  |
| Gender<br>(1 = Male; 0 = Female)                           | Self-reported.                                                                                                                                                                                                                                                                                                                                                                                                                                                                                                                                                                                                                                                                                                                                                                                   |
| Age                                                        | Numeric variable, self-reported in years.                                                                                                                                                                                                                                                                                                                                                                                                                                                                                                                                                                                                                                                                                                                                                        |
| Income                                                     | Interval variable. 'What is your net monthly income?' Coded as 0 = no income, and then categories ranging from 1 = up to 250 euros to 12 = More than 6000 euros.                                                                                                                                                                                                                                                                                                                                                                                                                                                                                                                                                                                                                                 |
| Education                                                  | Ordinal variable. 'Education' variable which ranged from 1 = can read and write to 7 = postgraduate.                                                                                                                                                                                                                                                                                                                                                                                                                                                                                                                                                                                                                                                                                             |
| No IDP                                                     | A binary variable which was coded as 1 if either of the following was true: Participant lost home in the north in 1974, parents lost their home in 1974, participants owned property in the north. If neither was true then participants was coded as 0.                                                                                                                                                                                                                                                                                                                                                                                                                                                                                                                                         |
| <b><i>Hopes and Realistic Threats</i></b>                  |                                                                                                                                                                                                                                                                                                                                                                                                                                                                                                                                                                                                                                                                                                                                                                                                  |
| Interference by Turkey in Federation<br>(ranging from 1-7) | Scale (cronbach's $\alpha = 0.81$ ) which comprised of the following seven 7-point Likert scale items: <ol style="list-style-type: none"> <li>1. People who came from Turkey will be more loyal to Turkey than to Federal Cyprus</li> <li>2. Turkey will try to interfere in decisions made by the federal government</li> <li>3. Turkish or Turkish Cypriot extremist groups will target Greek Cypriots</li> <li>4. Turkey will be intervening in how Federal Cyprus decides to explore and monetize its offshore natural resources</li> <li>5. Regional tensions involving Turkey and Greece will spill over to Cyprus and create inter-communal problems</li> <li>6. Most people will lack commitment to Federal institutions and will care only about their own constituent state</li> </ol> |

7. The Turkish Cypriot constituent state will try to secede and become an independent state

#### Disfunctionality of Federation

Scale (cronbach's  $\alpha = 0.80$ ) which comprised of the following five 7-point Likert scale items:

1. The new post solution conditions will be implemented smoothly, in accordance with agreed timelines (reverse coded)
2. There will be tension during the first few months or years, that will lead to the collapse of the agreement
3. Disputes over land or property will result in tensions and/or violence
4. There will be frequent deadlocks in the decision making of the federal government
5. Police officers and judges will be biased in favour of people from their own community

#### GCs Unready for Solution

Scale (cronbach's  $\alpha = 0.68$ ) which comprised of the following four 7-point Likert scale items:

1. Greek or Greek Cypriot extremist groups will target Turkish Cypriots
2. The Greek Cypriots will attempt to marginalize or even expel the Turkish Cypriots from the Federal government
3. The Orthodox Church will try to interfere in the decision making of the government
4. Greece will try to interfere in the decision making of the federal government

#### Hope for Economic Opportunities

Scale ( $r = 0.354^{***}$ ) which comprised of the following two 7-point Likert scale items:

1. The country will enjoy great economic prosperity following a settlement
2. Many people will lose their jobs because of the settlement (reverse coded)

#### Hope for free movement

Scale ( $r = 0.24^{**}$ ) which comprised of the following two 7-point Likert scale items:

1. Greek Cypriots will be able to move and settle, if that is their wish, in the Turkish Cypriot constituent state
2. Turkish Cypriots will be able to move and settle, if that is their wish, in the Greek Cypriot constituent state

---

**Symbolic Threat**

Scale (cronbach's  $\alpha = 0.80$ ) which comprised of the following three 7-point Likert scale items:

1. GCs and TCs in Cyprus have very different values
2. TCs sometimes do things that TCs/GCs would never do
3. Contact with TCs will lead us to lose our ethnic identity

**CBM related**

In favour of opening checkpoints

Scale (cronbach's  $\alpha = 0.77$ ) which comprised of the following three 7-point Likert scale items:

1. With the opening of checkpoints in 2003 better relations developed between the two communities in Cyprus
2. The checkpoints should close after an initiative by the Republic of Cyprus (reverse coded)
3. The opening of checkpoints brought the solution to the Cyprus problem closer

**Intergroup Trust**

Scale (cronbach's  $\alpha = 0.70$ ) which comprised of the following five 7-point Likert scale items:

1. I can not trust TCs because they want revenge for things we have done to them in the past (reverse coded)
2. I can trust TCs when they say that they love Cyprus
3. I can not trust TCs politicians when it comes to the implementation of an agreed solution (reverse coded)
4. I can trust TCs ordinary people when they say they want peace
5. I can trust TCs politicians when they say they want peace
